# Supplementary material
Source: MDPI journal article supplement (https://www.mdpi.com/2073-4441/13/11/1556)
Supplement: s1 [file s1]

---

## Supplementary Information

# Dynamic Changes of Microbiome with the Utilization of Volatile Fatty Acids as Electron Donors for Denitrification

Okkyoung Choi <sup>1,†</sup>, Se-jin Cha <sup>1,†</sup>, Hyunjin Kim <sup>1</sup>, Hyunook Kim <sup>2</sup> and Byoung-In Sang <sup>1,\*</sup>

<sup>1</sup> Department of Chemical Engineering, Hanyang University, 222 Wangsimni-ro, Seoul 04763, Korea; okgii77@hanyang.ac.kr (O.C.); ckck2@naver.com (S-j.C.); hyunjinkim@hanyang.ac.kr (Hyunjin.K.)

<sup>2</sup> Department of Environmental Engineering, University of Seoul, 163 Seoulsiripdae-ro, Seoul 02504, Korea; h\_kim@uos.ac.kr

\* Correspondence: biosang@hanyang.ac.kr; Tel.: +82-2-2220-2328

† The first two authors listed share first authorship.

**Calculations of COD equivalent**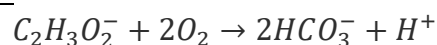

$$\frac{1 \text{ mol } O_2}{32 \text{ g COD}} \cdot \frac{1 \text{ mol acetate}}{2 \text{ mol } O_2} \cdot \frac{59.04 \text{ g acetate}}{1 \text{ mol acetate}} = \frac{0.92 \text{ g acetate}}{\text{g COD}} \quad \text{Eq. (S1)}$$

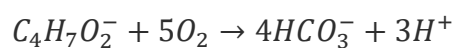

$$\frac{1 \text{ mol } O_2}{32 \text{ g COD}} \cdot \frac{1 \text{ mol butyrate}}{5 \text{ mol } O_2} \cdot \frac{87.1 \text{ g butyrate}}{1 \text{ mol butyrate}} = \frac{0.54 \text{ g butyrate}}{\text{g COD}} \quad \text{Eq. (S2)}$$

**Calculations of electron equivalent**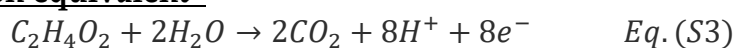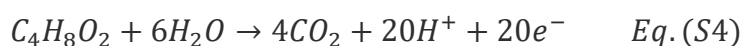

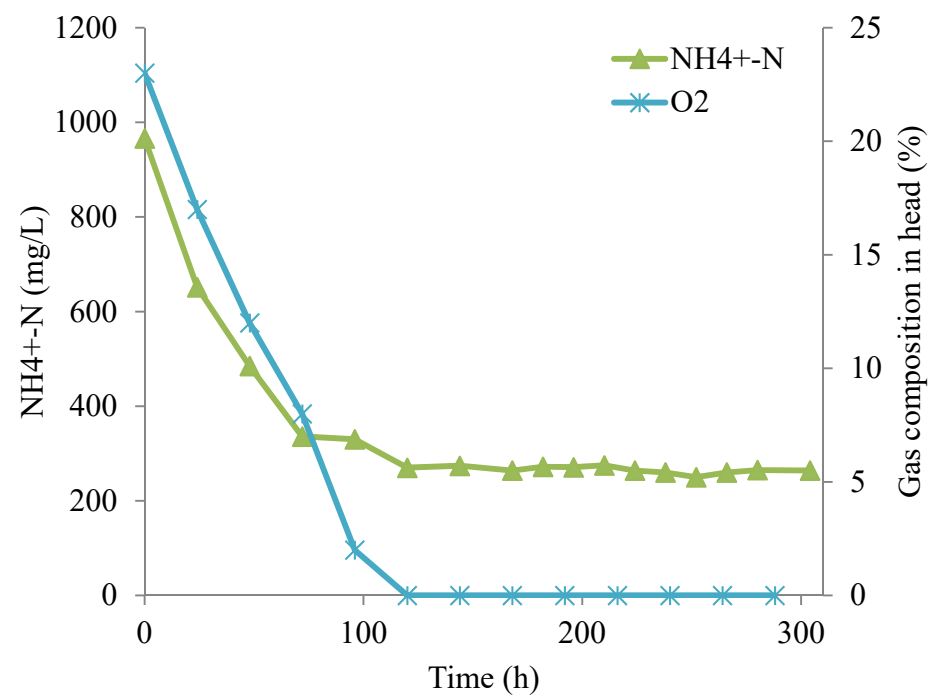

**Figure S1.** The ammonium removal limitation due to oxygen depletion.

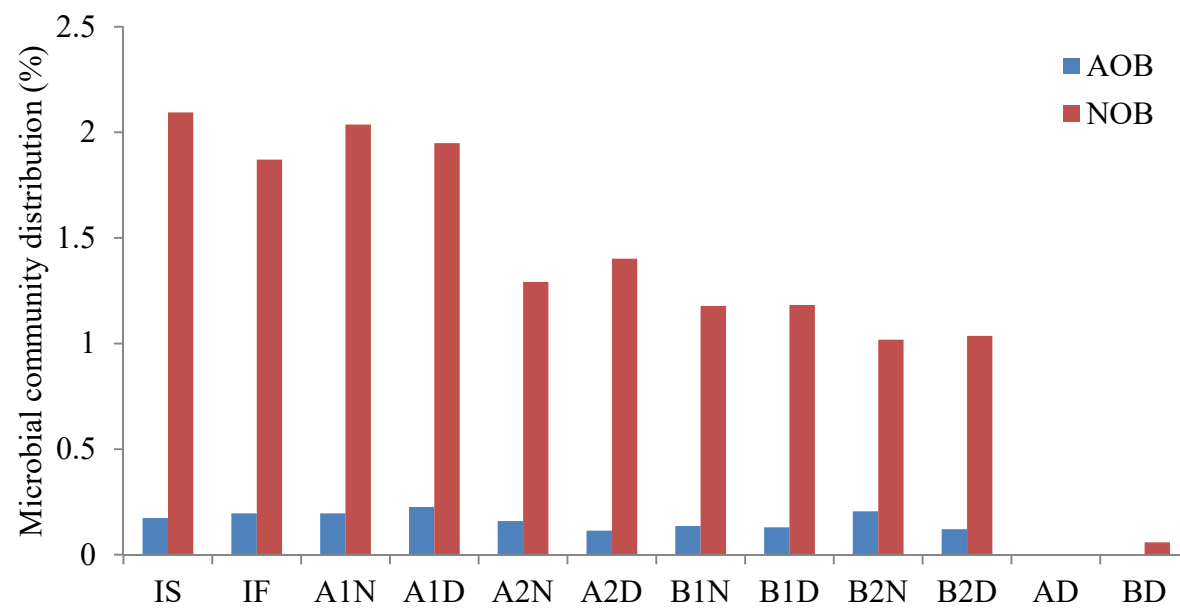

**Figure S2.** The distribution of ammonia-oxidizing bacteria (AOB) and nitrite-oxidizing bacteria (NOB) in each sample.
